# Supplementary material for: Spatial Partitioning of miRNAs Is Related to Sequence Similarity in Overall Transcriptome
Source: Int J Mol Sci. 2016 Jun 8;17(6):830. doi: 10.3390/ijms17060830 (PMC4926364; doi:10.3390/ijms17060830)
Supplement: Supplementary file 1 [file ijms-17-00830-s001.cpp]

#include <iostream>
#include <string>
using namespace std;
std::string a;
std::string w;
std::string H;
std::string A="A";

int c=0;
int main()
{
    a="TGTGCCGTGCAACGTGCAGTGCTGTGCCGTGCAACGTGCAGTGCTGTGCCGTGCAACGTGCAGTGC";// Replace this string with your data and run the program.

    while(a[c]!=0)
   {
       c=c+1;
   }
   string dat[c-21] ;
    for( int b = 0; b < c-21; b = b + 1 )
   {
       string w = a.substr (b, 22);
       int h=1;

       dat[b]=w;
       w.clear();
   }
for (int s=0;s<c-21;s=s+1)
{
   int COUNT=0;
    for (int F=s+1;F<c-21;F=F+1)
    {
        if (dat[s].compare(dat[F]) == 0)
    {
         COUNT=COUNT+1;
         dat[F]="0";
    }
    }
if (dat[s].compare("0") != 0)
{
    cout<<dat[s]<<" x "<<COUNT+1<<endl;
}

}

    return 0;
}
